# Supplementary material for: Solid-state 13 C-NMR spectroscopic determination of sidechain mobilities in zirconium-based metal-organic frameworks
Source: Copernicus journal article supplement (doi:10.5194/mr-2023-13), 2023-09-22
Supplement: Supplementary file 1 [file mr-2023-13-supplement.pdf]

## Supplement

### *Solid-state $^{13}\text{C}$ -NMR spectroscopic determination of sidechain mobilities in zirconium-based metal-organic frameworks*

Günter Hempel,<sup>1</sup> Ricardo Kurz,<sup>1</sup> Silvia Paasch,<sup>2</sup> Kay Saalwächter,<sup>1</sup> and Eike Brunner<sup>2</sup>

<sup>1</sup>*Martin-Luther-Universität Halle-Wittenberg, Institut für Physik – NMR,  
Betty-Heimann-Str. 7, 06120 Halle, Germany*

<sup>2</sup>*Technische Universität Dresden, Fakultät für Chemie und Lebensmittelchemie,  
Bioanalytische Chemie, 01062 Dresden, Germany*

#### S1. LINE DECOMPOSITIONS

See Figs. 1, 2, and 3.

#### S2. DIPSHIFT DIAGRAMS

In the diagrams in this section, at the left-hand side the data are shown together with the fitted model functions. The right-hand sides show plots of the mean-square deviation  $\chi^2$  versus damping constant  $r$  and residual dipolar coupling  $D_{\text{res}}$ . In the latter, the cross marks the position of minimum mean-square deviation  $\chi_{\text{min}}^2$ ; the closed line connects all points where  $\chi^2 = 2\chi_{\text{min}}^2$ . The evaluation was not executed for all spinning frequencies; it was omitted for such frequencies where the line under consideration had a distance of an integer multiple of spinning frequency to another line.

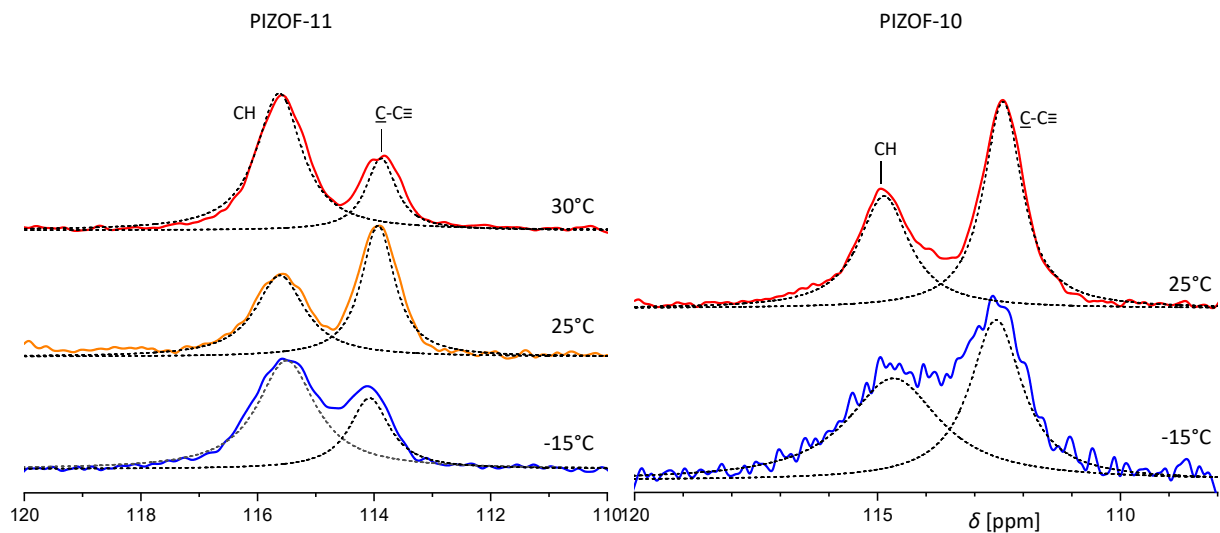

Figure 1. Decomposition of overlapping middle-ring lines of both protonated carbons and those carbons bound to C $\equiv$ C in PIZOF-10 (right) and in PIZOF-11 (left).

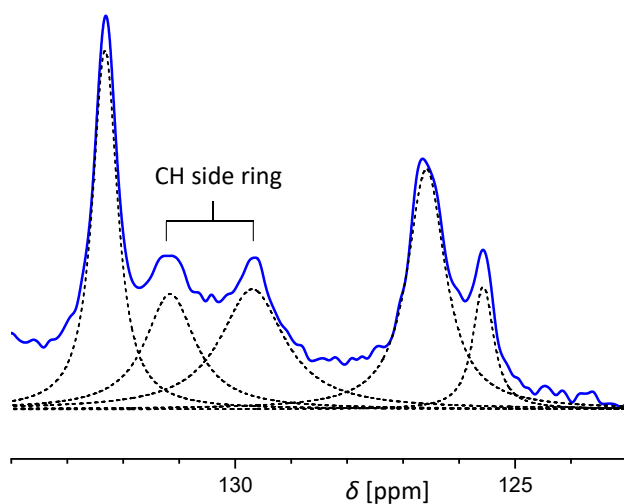

Figure 2. Decomposition of overlapping lines in the region 120 ... 140 ppm in PIZOF-2.)

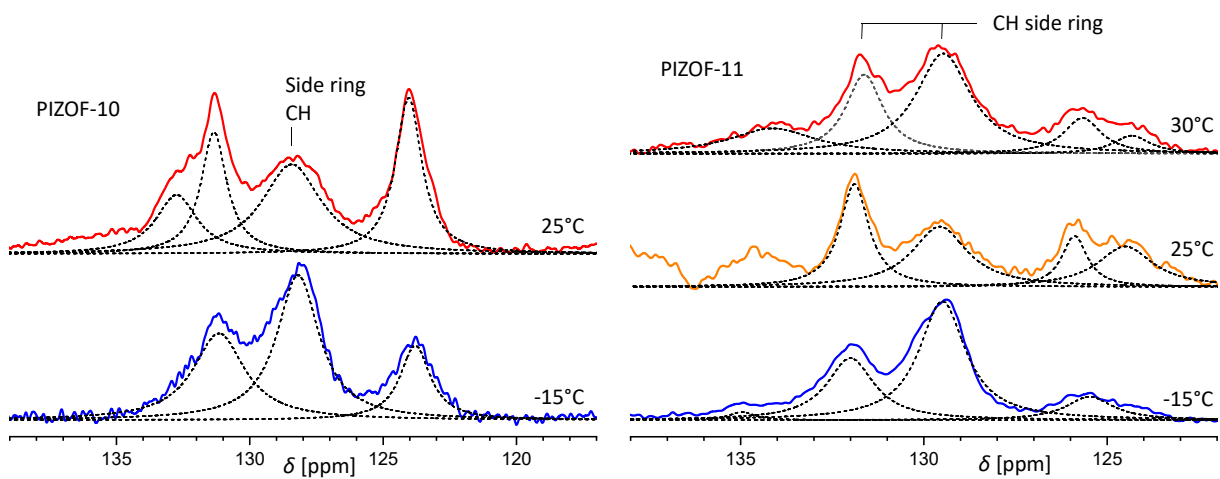

Figure 3. Decomposition of overlapping lines in the region 120 ... 140 ppm in PIZOF-10 and in PIZOF-11.)

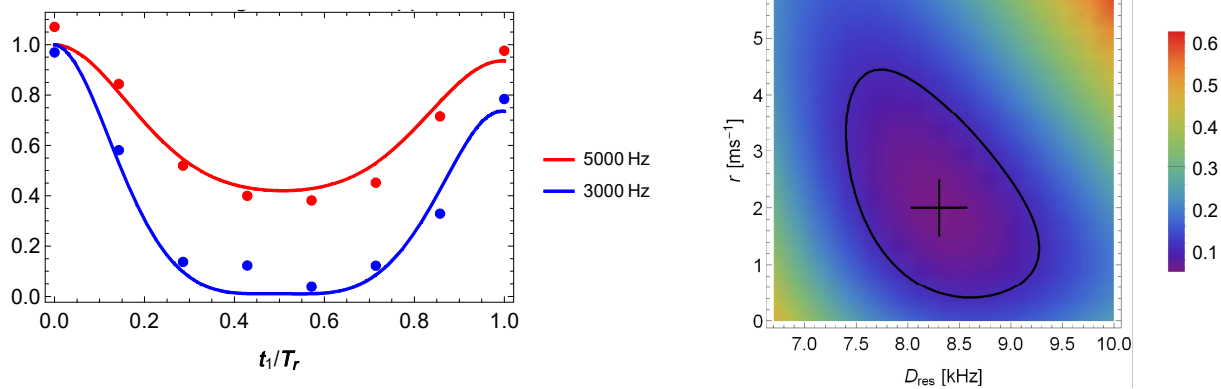

Figure 4. PIZOF-2, -15°C, CH of side ring, model function 1

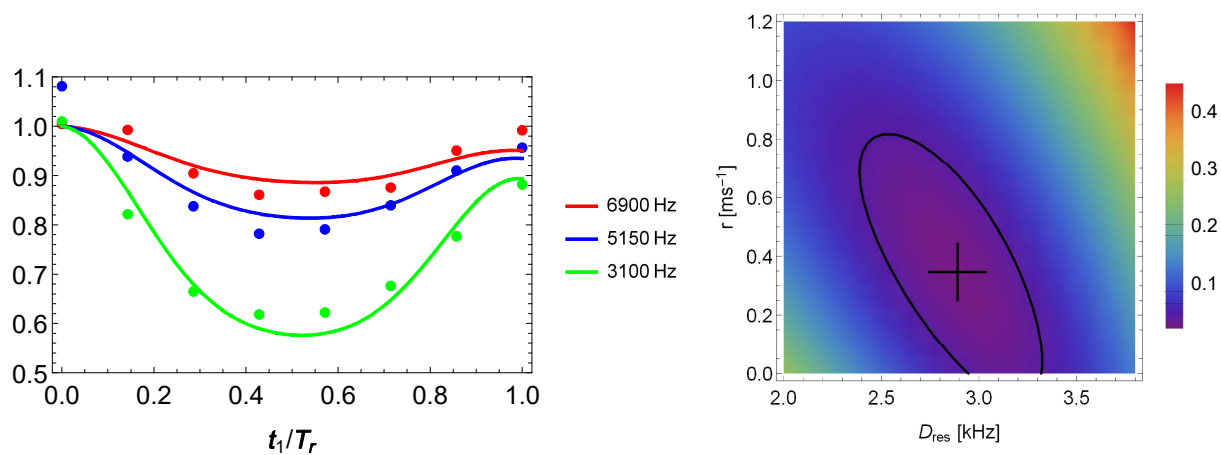Figure 5. PIZOF-10, -15°C,  $\text{CH}_2$ , left component, model function 3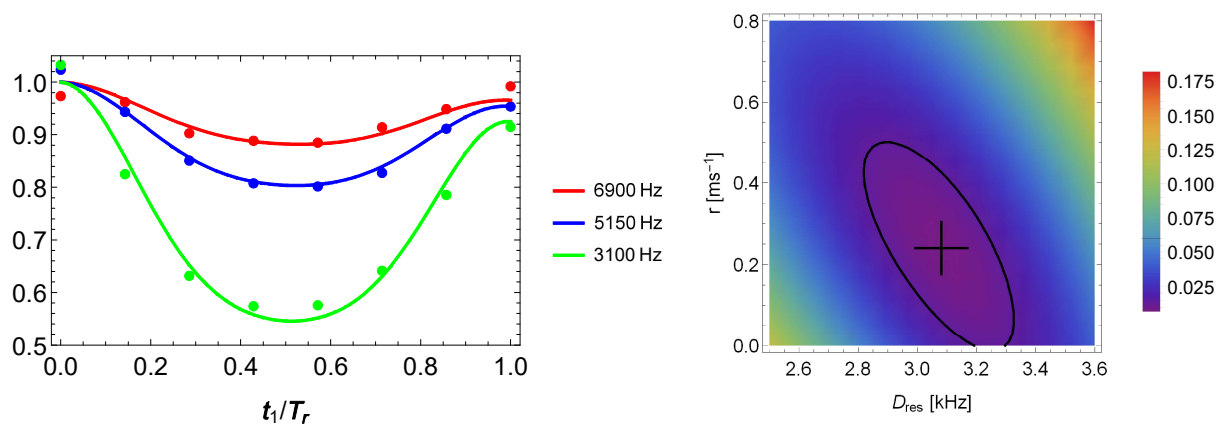Figure 6. PIZOF-10, -15°C,  $\text{CH}_2$ , middle component, model function 3

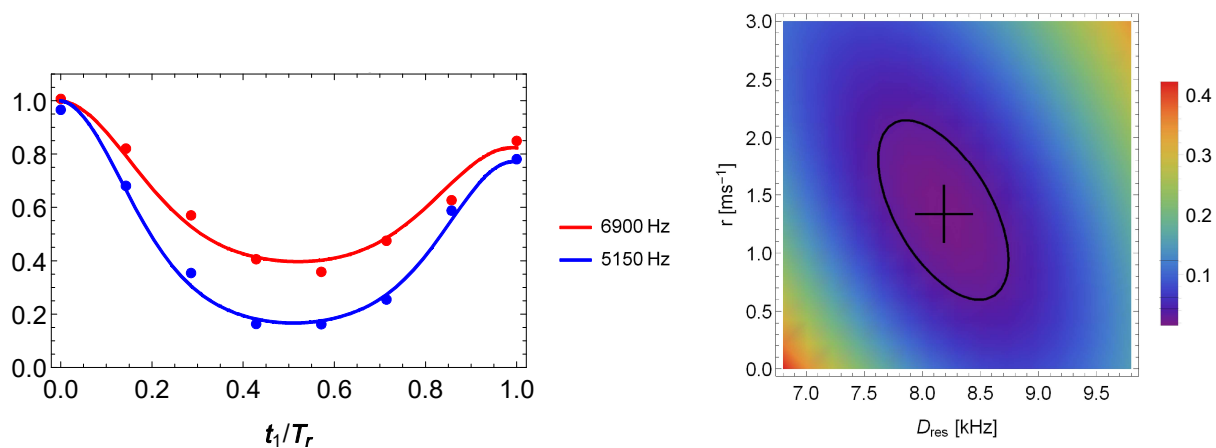Figure 7. PIZOF-10, -15°C, CH<sub>2</sub>, right component, model function 3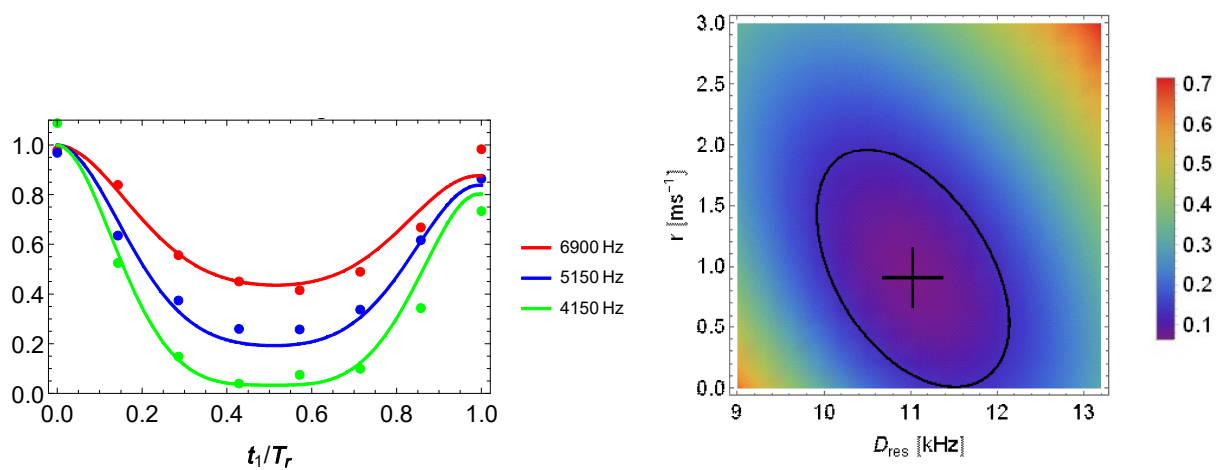

Figure 8. PIZOF-10, -15°C, CH of side ring, model function 1

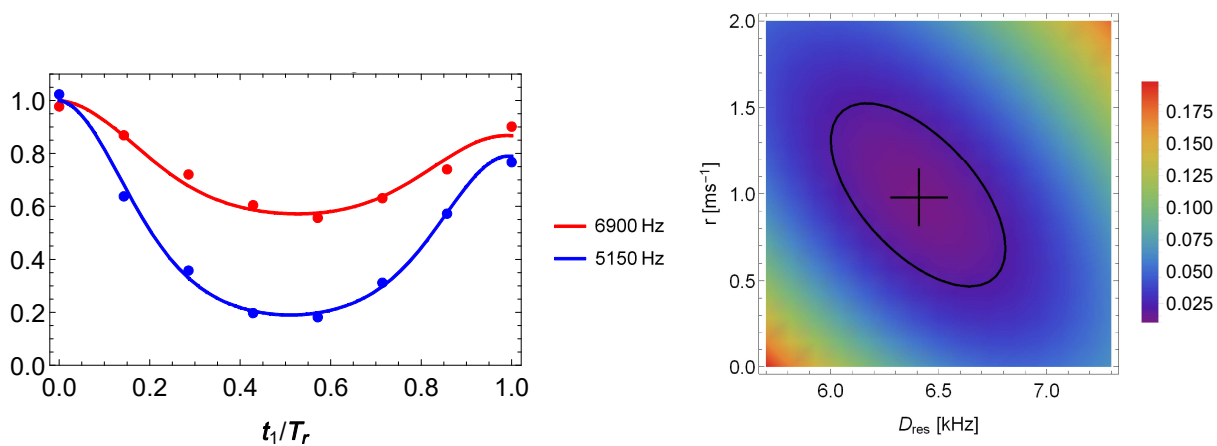Figure 9. PIZOF-10, 25°C, CH<sub>2</sub> right component, model function 3



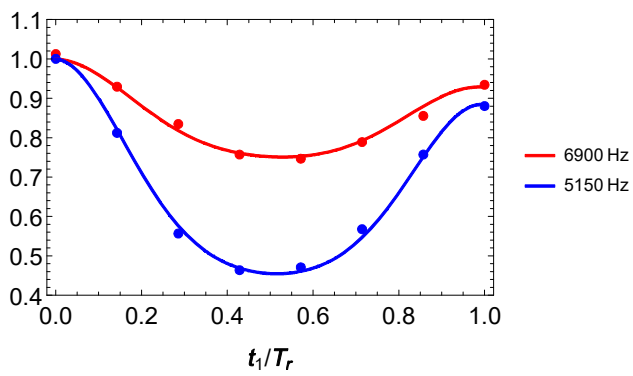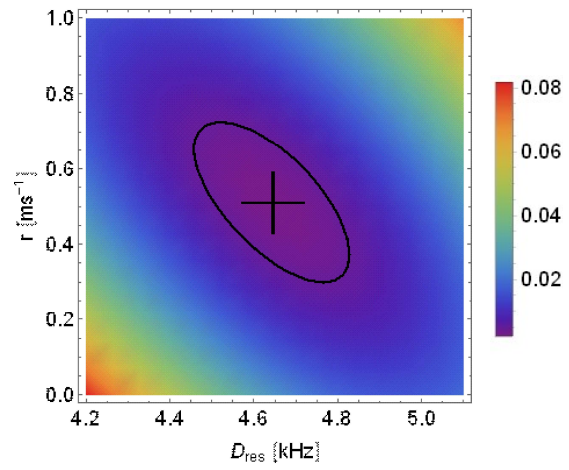Figure 10. PIZOF-10, 25°C, CH<sub>2</sub> 2nd component from right, model function 3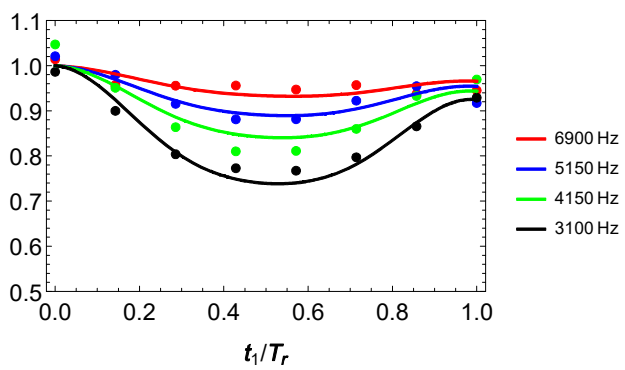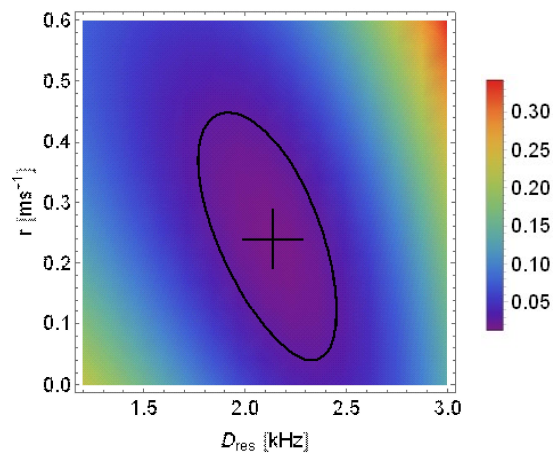Figure 11. PIZOF-10, 25°C, CH<sub>2</sub> middle component, model function 3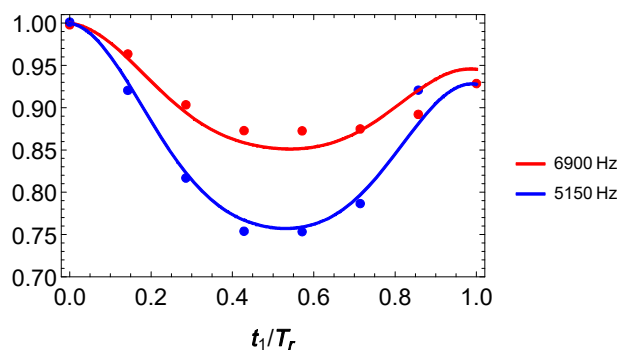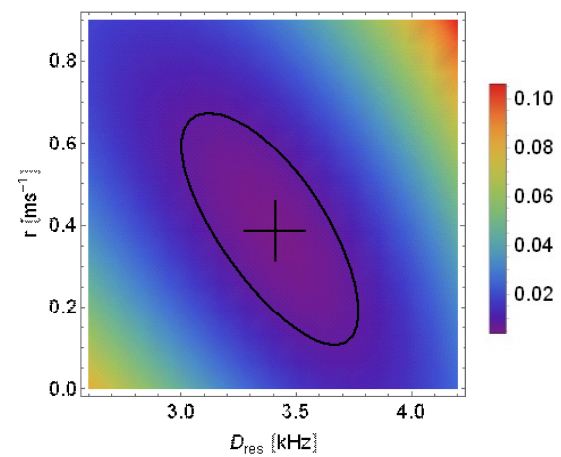Figure 12. PIZOF-10, 25°C, CH<sub>2</sub> 2nd component from right, model function 3

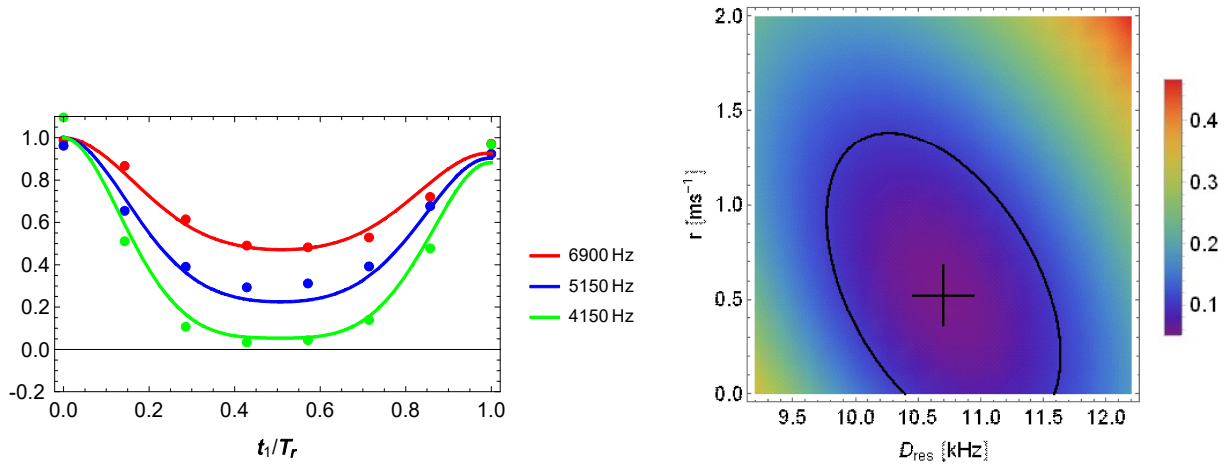

Figure 13. PIZOF-10, 25°C, CH of middle ring, model function 1

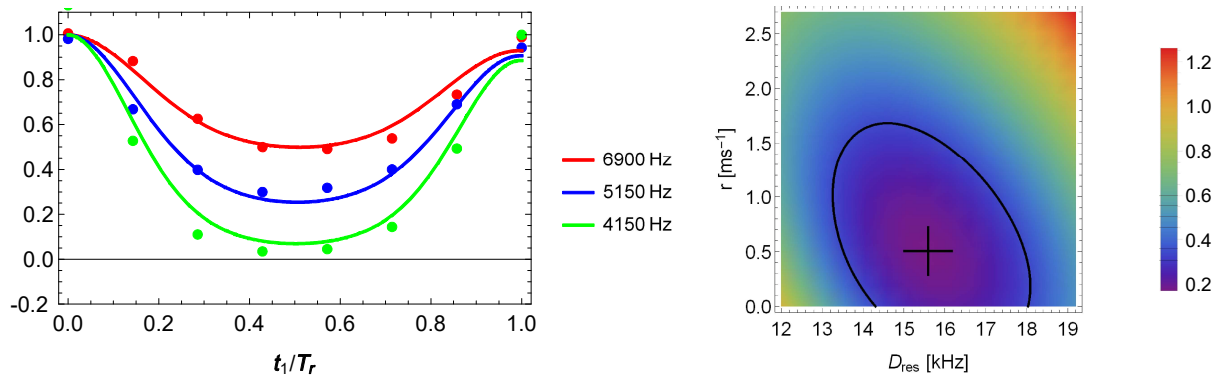

Figure 14. PIZOF-10, 25°C, CH of middle ring, model function 2

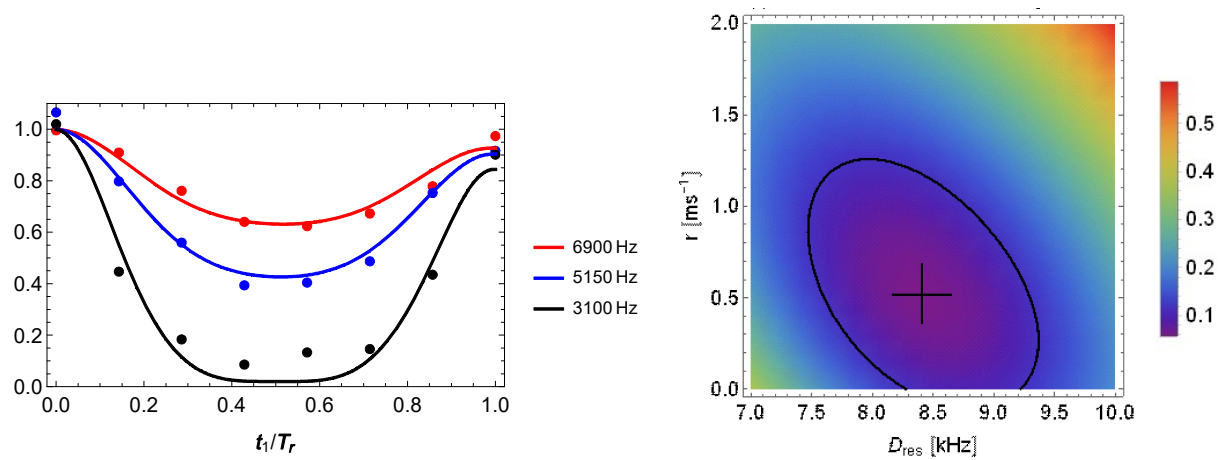

Figure 15. PIZOF-10, 25°C, CH of side ring, model function 1

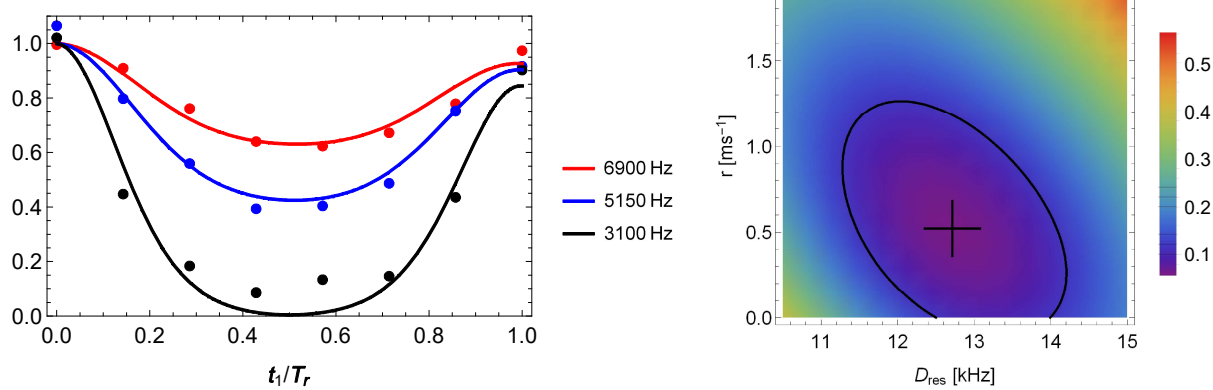

Figure 16. PIZOF-10, 25°C, CH of side ring, model function 2

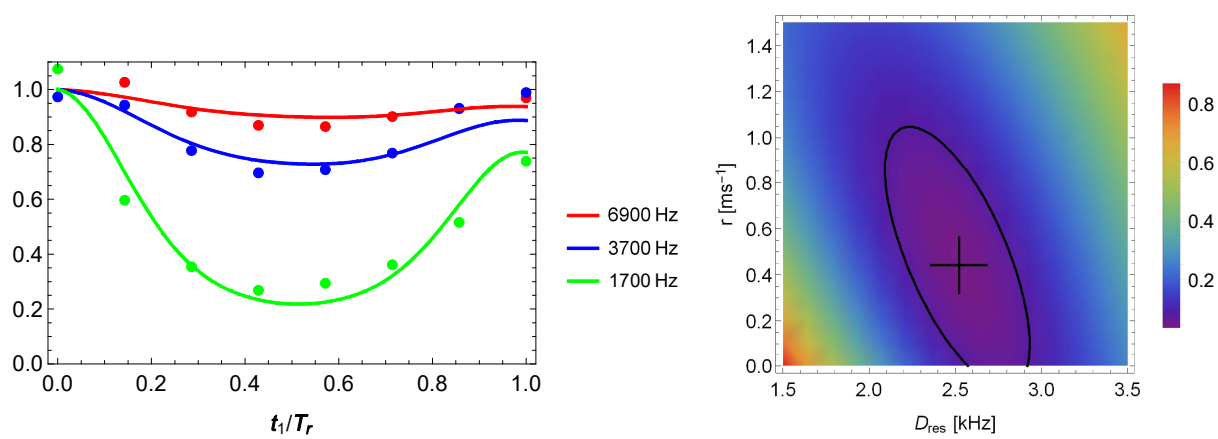Figure 17. PIZOF-11, -15°C,  $\delta$ -CH<sub>2</sub> left component, model function 3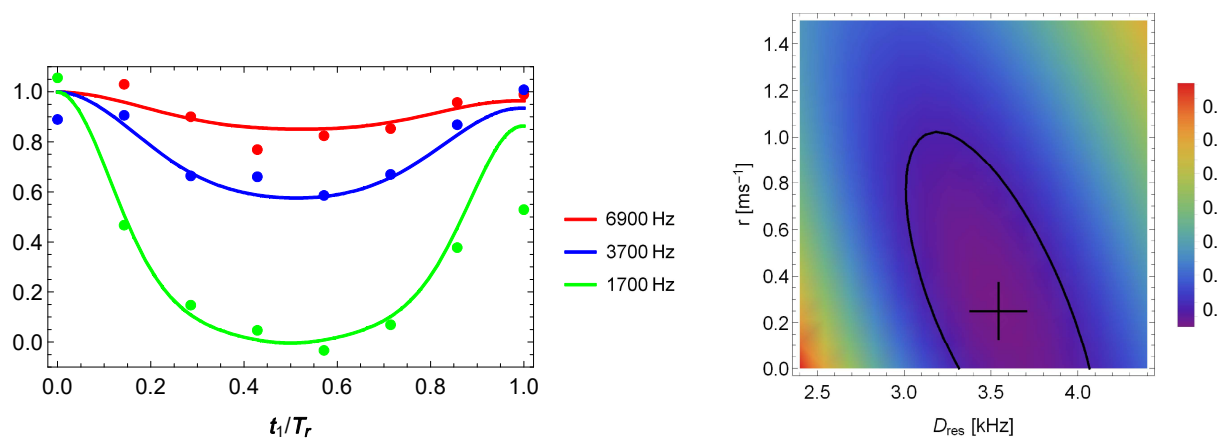Figure 18. PIZOF-11, -15°C,  $\epsilon$ -CH<sub>2</sub>, model function 3

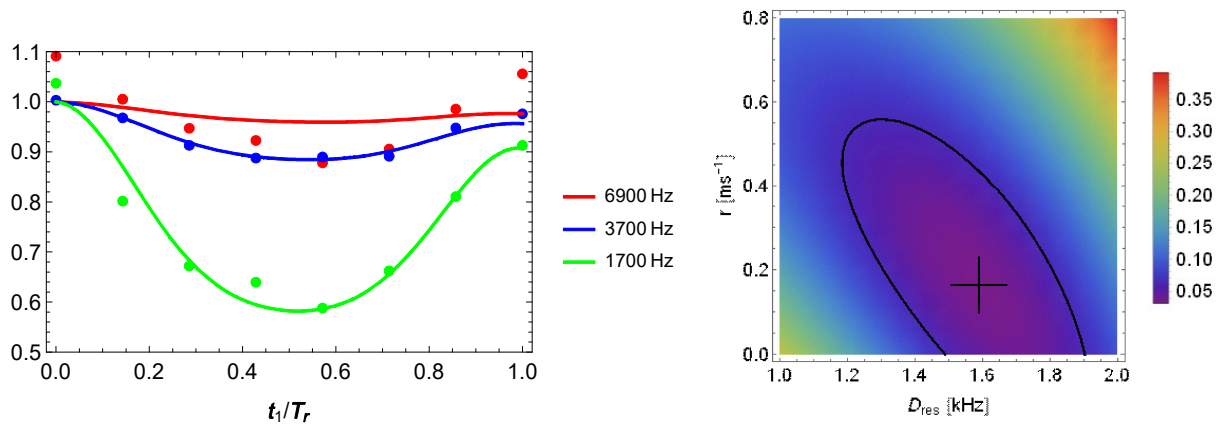Figure 19. PIZOF-11, 30°C,  $\gamma$ -CH<sub>2</sub>, model function 3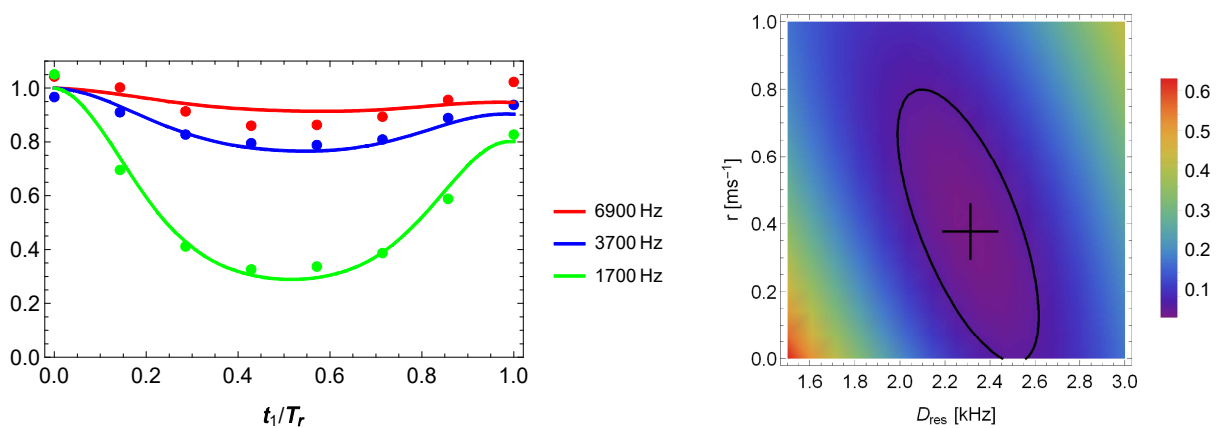Figure 20. PIZOF-11, 30°C,  $\delta$ -CH<sub>2</sub>, model function 3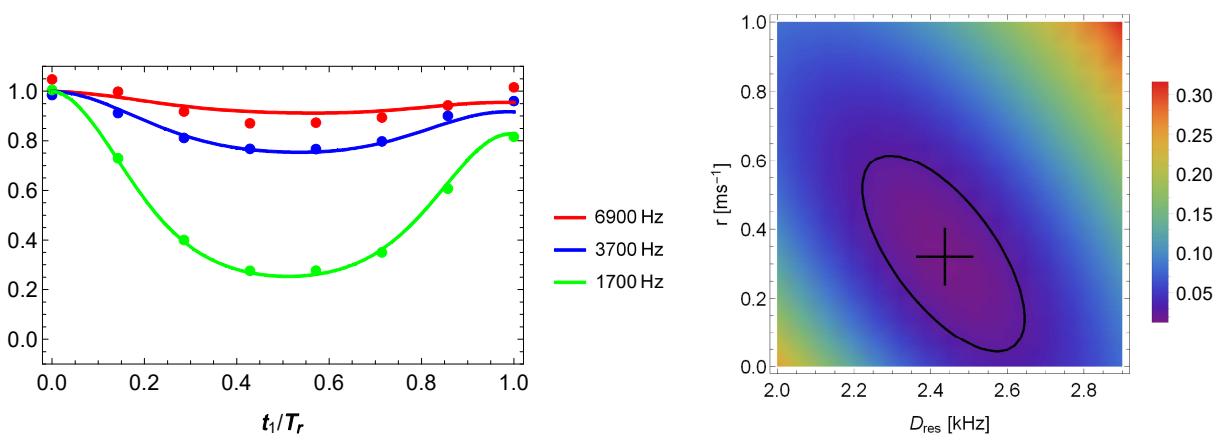Figure 21. PIZOF-11, 30°C,  $\epsilon$ -CH<sub>2</sub>, model function 3

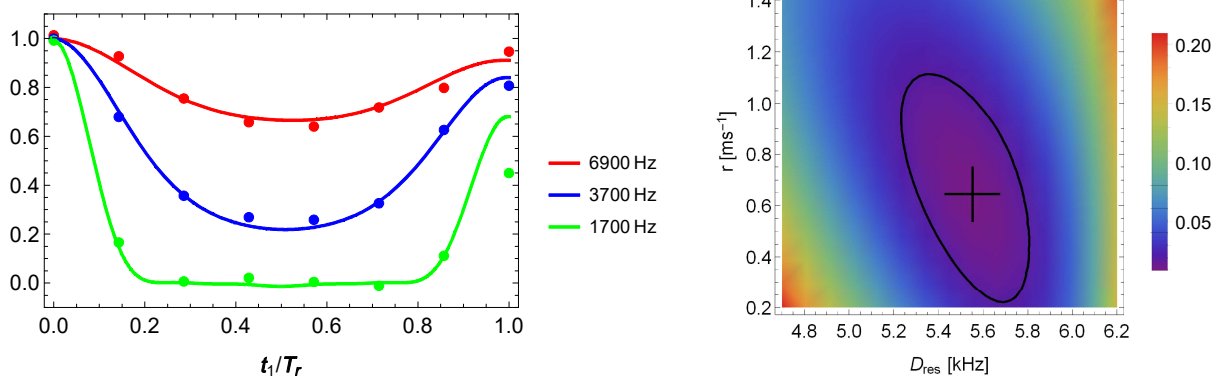Figure 22. PIZOF-11, 30°C,  $\omega$ -CH<sub>2</sub>, model function 3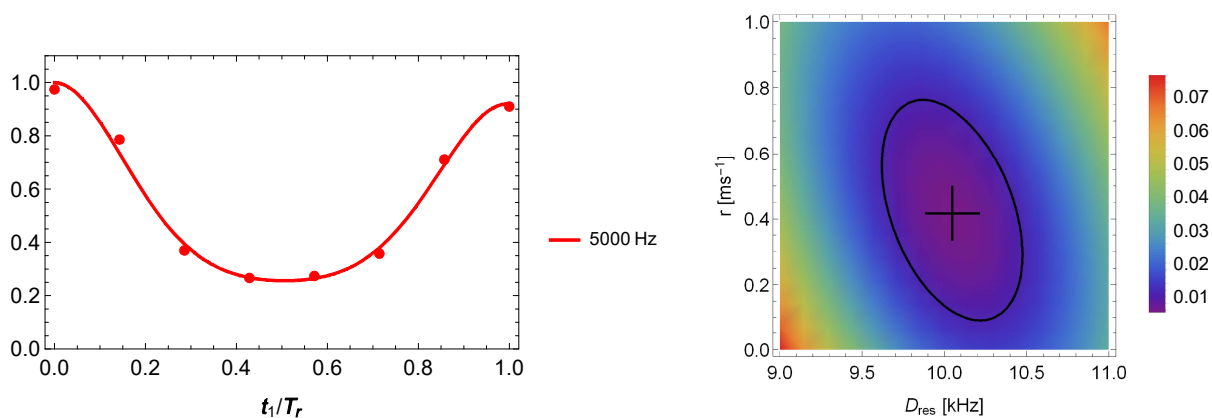

Figure 23. PIZOF-11, 25°C, middle ring, model function 1

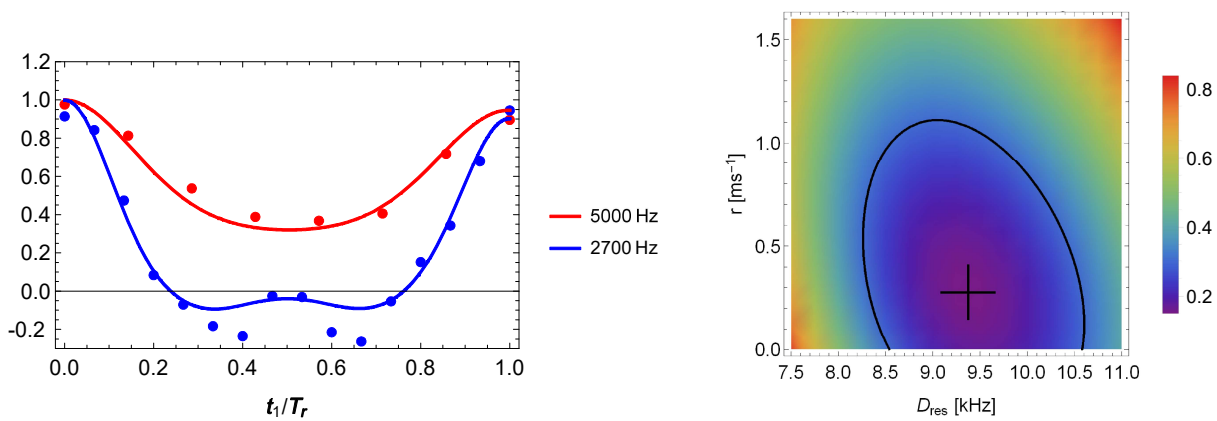

Figure 24. PIZOF-11, 25°C, side ring, model function 1
